# Supplementary material for: Pancreatic stone protein as an early biomarker predicting mortality in a prospective cohort of patients with sepsis requiring ICU management
Source: Springer Nature journal article supplement (doi:10.1186/cc11406), 2012-07-02

**A**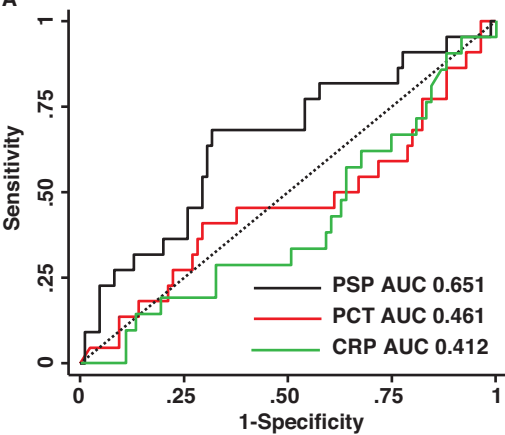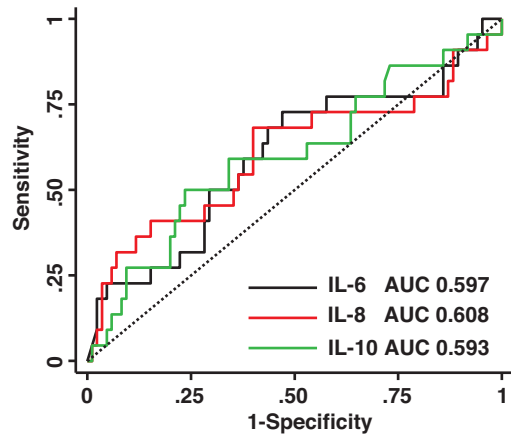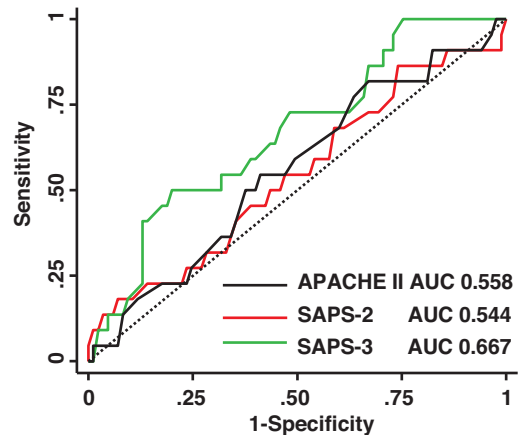**B**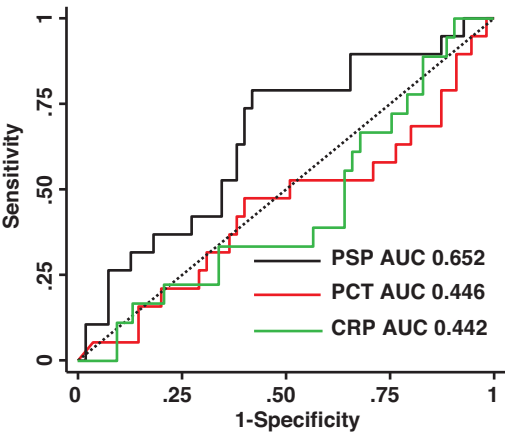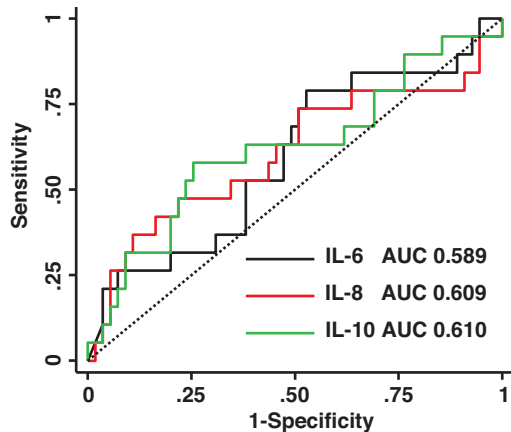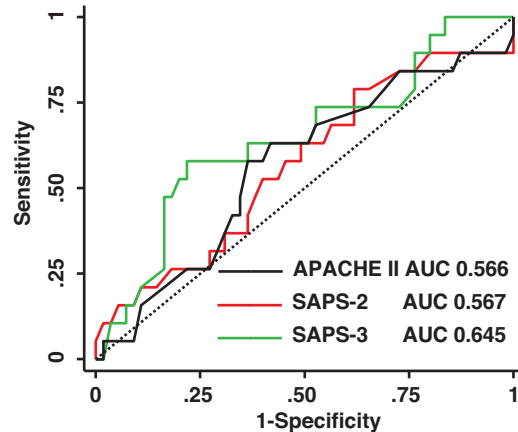

Supplement: 13054_2012_645_MOESM5_ESM.pdf [file 13054_2012_645_MOESM5_ESM.pdf]
